# Supplementary material for: Effects of Supplementary Strength–Power Training on Neuromuscular Performance in Young Female Athletes
Source: PubMed Central journal article supplement (PMC7466675; doi:10.3390/sports8080104), 2020-07-24
Supplement: sports-08-00104-s001.pdf [file sports-08-00104-s001.pdf]

**Table S1.** Plyometric and strength exercises used by the athletes of the training group.

| PLYOMETRIC EXERCISES                                                     | STRENGTH EXERCISES                                           |
|--------------------------------------------------------------------------|--------------------------------------------------------------|
| Jumping lunges with resistance band                                      | Pushups                                                      |
| Medicine ball (3 kg) throwing and catching while skipping                | Lateral plank walks                                          |
| Squat jumps with half-turn                                               | Leg scissors with resistance band                            |
| Single leg jumping hip thrust                                            | Half burpees with resistance band                            |
| Hands rebounds on plank position                                         | Squat side-kicks with a 5 kg kettlebell                      |
| Snap down (gymnastics drill)                                             | Hip thrust with resistance band                              |
| Squat jumps with resistance band                                         | Overhead triceps extension with resistance band              |
| Resistance band abductor squat jumps                                     | Shoulder extension with resistance band from plank position  |
| Clapping push-ups with feet elevated                                     | Squat with a 5 kg kettlebell                                 |
| Drop jumps from 45 cm                                                    | Lateral plank walking with push up                           |
| Burpees                                                                  | Squat side-kicks with resistance band                        |
| Squat jumps over a step holding a 5 kg kettlebell                        | Rowing movement with resistance band                         |
| Step-up and jump with knee lift with resistance band                     | Straddle steps with a 5 kg kettlebell                        |
| Fast skipping with resistance band                                       | Swings with a 5 kg kettlebell and resistance band            |
| Reverse lunge, step-up and jump with knee lift                           | Elbow extensions with resistance band                        |
| Single leg side jumping with resistance band                             | Back scale with kettlebell 4/5kg                             |
| Box jumps with resistance band                                           | Push-Press with resistance band                              |
| Fast skipping with resistance band                                       | Single arm row with a 5 kg kettlebell                        |
| Single-leg box jumps to land on two-legs with resistance band            | Plank with side knee flexion                                 |
| Bulgarian split squat jump                                               | Bulgarian split squat holding two 4 kg kettlebells           |
| Tuck jumps over 6 low hurdles                                            | Pistol squats (changing leg for each repetition)             |
| Pistol squat and jump                                                    | Arm row holding two 4 kg kettlebells                         |
| Overhead press from squat position and jump holding two 4 kg kettlebells | Overhead press from squat position with two 4 kg kettlebells |
